# Supplementary material
Source: publisher figshare collection journal article supplement (https://brill.figshare.com/articles/dataset/_/14267558)
Supplement: Supplementary file 1 [file 1]

**DNA-barcode and endophallus morphology delimit congruent species  
in a systematic revision of the oxyporine rove beetles of Russia  
(Coleoptera: Staphylinidae: Oxyporinae)**

*Alexandra S. Tokareva*

Zoological Institute, Russian Academy of Sciences, Universitetskaya nab. 1, St. Petersburg  
199034, Russia

*Fedor V. Konstantinov*

Zoological Institute, Russian Academy of Sciences, Universitetskaya nab. 1, St. Petersburg  
199034, Russia

Department of Entomology, Faculty of Biology, St. Petersburg State University,  
Universitetskaya nab. 7/9, St. Petersburg 199034, Russia

*Adam J. Brunke*

Canadian National Collection of Insects, Agriculture and Agri-Food Canada, Ottawa, ON,  
K1A 0C6, Canada

*Alexey Solodovnikov*

Natural History Museum of Denmark, Zoological Museum, Universitetsparken 15,  
Copenhagen 2100, Denmark

Zoological Institute, Russian Academy of Sciences, Universitetskaya nab. 1, St. Petersburg  
199034, Russia

## Supplementary material

- MATERIAL S1      Pairwise nucleotide distance matrix of the barcoding CO1 region for *Oxyporus* species. Genetic distances in terms of the number of base substitutions per site between sequences.
- MATERIAL S2      Morphological matrix for *Oxyporus* in nexus format.
- MATERIAL S3      COI sequences matrix, aligned with MAFFT v. 7.450, in fasta format.
- MATERIAL S4-S24    Reconstructed ancestral states for characters 1-6, 9-14, 16-19, 21, 23-25, 27, 29 in the Extensible TreeGraph format.
